# Supplementary material for: First detection and genetic characterization of ungulate tetraparvovirus 2 and ungulate tetraparvovirus 4 in special livestock on the Qinghai-Tibet Plateau in China
Source: PubMed Central journal article supplement (PMC6498466; doi:10.1186/s12985-019-1167-z), 2019-05-02
Supplement: 12985_2019_1167_MOESM1_ESM.pdf [file 12985_2019_1167_MOESM1_ESM.pdf]

**Additional file 1.** Detection rates of ungulate tetraparvovirus 2 (P-PARV4) in domestic pigs and Tibetan pigs, ungulate tetraparvovirus 4 (O-PARV4) in ovine and Tibetan sheep on the Qinghai-Tibetan Plateau, China.

| Species (Animals) | Location (Province) | Age (Months) | No <sup>a</sup> | P-PARV4 (%) <sup>b</sup> | P-PARV4 in all samples (%) <sup>c</sup> | O-PARV4 (%) <sup>b</sup> | O-PARV4 in all samples (%) <sup>c</sup> |
|-------------------|---------------------|--------------|-----------------|--------------------------|-----------------------------------------|--------------------------|-----------------------------------------|
| Domestic pigs     | Gansu               | ≤ 1          | 64              | 13/64(20.31)             | 22/116(18.97)                           |                          |                                         |
|                   |                     | > 1          | 52              | 9/52(17.31)              |                                         |                          |                                         |
|                   | Qinghai             | ≤ 1          | 59              | 8/59(13.56)              | 12/102(11.76)                           |                          |                                         |
|                   |                     | > 1          | 43              | 4/43(9.30)               |                                         |                          |                                         |
| Tibetan pigs      | Gansu               | ≤ 1          | 49              | 8/49(16.33)              | 13/91(14.29)                            |                          |                                         |
|                   |                     | > 1          | 42              | 5/42(11.90)              |                                         |                          |                                         |
|                   | Qinghai             | ≤ 1          | 38              | 2/38(5.26)               | 4/90(4.44)                              |                          |                                         |
|                   |                     | > 1          | 45              | 2/52(3.85)               |                                         |                          |                                         |
| Ovine             | Gansu               | ≤ 1          | 67              |                          |                                         | 5/67(7.46)               | 8/121(6.61)                             |
|                   |                     | > 1          | 54              |                          |                                         | 3/54(5.56)               |                                         |
|                   | Qinghai             | ≤ 1          | 72              |                          |                                         | 6/72(8.33)               | 10/125(8.00)                            |
|                   |                     | > 1          | 53              |                          |                                         | 4/53(7.55)               |                                         |
| Tibetan sheep     | Gansu               | ≤ 1          | 62              |                          |                                         | 4/62(6.45)               | 5/110(4.55)                             |
|                   |                     | > 1          | 48              |                          |                                         | 1/48(2.08)               |                                         |
|                   | Qinghai             | ≤ 1          | 45              |                          |                                         | 3/45(6.67)               | 6/109(5.50)                             |
|                   |                     | > 1          | 63              |                          |                                         | 3/63(4.76)               |                                         |

<sup>a</sup> The number of domestic pigs, tibetan pigs, ovine, tibetan sheep samples collected from each provinces with two age groups in the study.

<sup>b</sup> Number and percentage of positive samples in each age group of different provinces.

<sup>c</sup> Number and percentage of positive samples in all age groups of different provinces.
