# Supplementary material for: First detection and genetic characterization of ungulate tetraparvovirus 2 and ungulate tetraparvovirus 4 in special livestock on the Qinghai-Tibet Plateau in China
Source: PubMed Central journal article supplement (PMC6498466; doi:10.1186/s12985-019-1167-z), 2019-05-02
Supplement: 12985_2019_1167_MOESM2_ESM.pdf [file 12985_2019_1167_MOESM2_ESM.pdf]

**Additional file 2** Primers used for detection and full-length genome amplification of P-PARV4 and O-PARV4 in different hosts.

| Primers    | Sequences                       | Binding position <sup>a</sup> | Length <sup>b</sup> | Function <sup>c</sup>                                                    | Reference             |
|------------|---------------------------------|-------------------------------|---------------------|--------------------------------------------------------------------------|-----------------------|
| PARV4-F    | 5'-GGACYTCTATGYTRGCTGAYCG-3'    | 3404-4043(EU200676)           | 640                 | PARV4 detection in domestic pigs, Tibetan pigs, ovine and Tibetan sheep. | EU200676 and JF504700 |
| PARV4-R    | 5'-TKATCKACMCCWGTTCATGATMGC-3'  | 3518-4157(JF504700)           |                     |                                                                          |                       |
| P-PAPV4-F1 | 5'-CCTATAAGAATCAGTGTTCAGTTCC-3' | 64-1529                       | 1466                | Amplify full-length P-PARV4 genomes in domestic pigs and Tibetan pigs    | EU200676              |
| P-PAPV4-R1 | 5'-CTCAGATCTCTTTCTGGCAACG-3'    |                               |                     |                                                                          |                       |
| P-PAPV4-F2 | 5'-CCTACAGACAAGAATAACTATG-3'    | 1449-3304                     | 1856                |                                                                          |                       |
| P-PAPV4-R2 | 5'-CAGCCATGATTGTAGCAGGATCA-3'   |                               |                     |                                                                          |                       |
| P-PAPV4-F3 | 5'-GCAGATGTTCAATTATCACAGG-3'    | 3127-4358                     | 1232                |                                                                          |                       |
| P-PAPV4-R3 | 5'-TCCTCTGTGTGGCCGGTATAACT-3'   |                               |                     |                                                                          |                       |
| P-PAPV4-F4 | 5'-GTTCCCTAAGTGGAAAAGGCCAG-3'   | 4051-5014                     | 964                 |                                                                          |                       |
| P-PAPV4-R4 | 5'-GTCAGACATCTTTGTTGCATCAG-3'   |                               |                     |                                                                          |                       |
| O-PAPV4-F1 | 5'-CACTTCCGCATTAGTGCTGAATC-3'   | 64-1940                       | 1877                | Amplify full-length O-PARV4 genomes in ovine and Tibetan sheep           | JF504700              |
| O-PAPV4-R1 | 5'-GAGGTACCTTTGATATTCCTCGTC-3'  |                               |                     |                                                                          |                       |
| O-PAPV4-F2 | 5'-GATAGTGAAGATGATTGGTTCC-3'    | 1761-2906                     | 1146                |                                                                          |                       |
| O-PAPV4-R2 | 5'-GGAGTAGTTCCTCTACCACTGTC 3'   |                               |                     |                                                                          |                       |
| O-PAPV4-F3 | 5'-GTGCTATATGACCTGTATAGATC-3'   | 2689-4253                     | 1565                |                                                                          |                       |
| O-PAPV4-R3 | 5'-TCAGTGGGCATCATTAGAGATG-3'    |                               |                     |                                                                          |                       |
| O-PAPV4-F4 | 5'-GAACCATGTTCCCTGGCCCATCTC-3'  | 4215-5122                     | 908                 |                                                                          |                       |
| O-PAPV4-R4 | 5'- CAAGAATCAGGCTCAGACACAC-3'   |                               |                     |                                                                          |                       |

F, forward; R, reverse orientation; Y = C/T; K = G/T; R = A/G; M = C/A; W = T/A;

<sup>a</sup> Nucleotide positions are according to the genomes of Porcine hokovirus strain HK6 (EU200676) and Ovine hokovirus strain HK-S04(JF504700).

<sup>b</sup> Amplicon size is given in base pairs

<sup>c</sup> The aim of the primers used in this study.
